# Supplementary material for: Continuous enrichment of low-abundance cell samples using standing surface acoustic waves (SSAW)
Source: Royal Society of Chemistry journal article supplement (doi:10.1039/c3lc51001h), 2014-01-01
Supplement: c3lc51001h.pdf [file c3lc51001h.pdf]

Electronic Supplementary Information (ESI) for Lab on a Chip

## Continuous enrichment of low-abundance cell sample using standing surface acoustic waves (SSAW)

Yuchao Chen,<sup>a</sup> Sixing Li,<sup>a,b</sup> Yeyi Gu,<sup>c</sup> Peng Li,<sup>a</sup> Xiaoyun Ding,<sup>a</sup> J. Philip McCoy,<sup>d</sup> Stewart J. Levine<sup>d</sup> and Tony Jun Huang<sup>\*a,b</sup>

<sup>a</sup> *Department of Engineering Science and Mechanics, The Pennsylvania State University, University Park, PA, 16802, USA. E-mail: junhuang@psu.edu*

<sup>b</sup> *Cell and Developmental Biology (CDB) Graduate Program, The Huck Institutes of the Life Sciences, The Pennsylvania State University, University Park, PA 16802, USA.*

<sup>c</sup> *Department of Food Science, The Pennsylvania State University, University Park, PA, 16802, USA.*

<sup>d</sup> *National Heart, Lung, and Blood Institute, NIH, Bethesda, MD 20892, USA.*

**Video 1:** Acoustic trapping at the exit of coupling region. While power was on, all of the particles were retained inside the enrichment region. Even though continuous flows were applied, no fluorescent particle was observed in the lower reaches of the microchannel, indicating effective particle trapping by SSAW.

**Video 2:** Acoustic trapping at the entrance of coupling region. As soon as the power was turned on, the sample was gradually enriched from the entrance of the coupling region.

**Video 3:** Release of the enriched sample. As soon as the power was turned off, the enriched sample was released and simultaneously removed by the flow in a short time.

**Video 4:** Multichannel sample enrichment. The video shows sample enrichment is performed in three channels simultaneously.
